# Supplementary material for: First description of Nodding Syndrome in the Central African Republic
Source: PubMed Central journal article supplement (PMC8244846; doi:10.1371/journal.pntd.0009430), 2021-06-18
Supplement: pntd.0009430.s004.pdf [file pntd.0009430.s004.pdf]

# Nodding Syndrome en RCA 2019 (Histoire naturelle)

## HISTOIRE NATURELLE DU NODDING SYNDROME

### Nom de l'enquêteur

- Pascal MBELESSO
- Salvatore METANMO

### Spécialité de l'enquêteur

- Neurologue
- Médecin généraliste

### Date

yyyy-mm-dd

---

### Identifiant

---

### 2-1 Situation matrimoniale :

- Marié (e)
- Union libre
- Célibataire
- Divorcé (e)/Séparé (e)
- Veuf (ve)

### 2-2 Avez-vous été à l'école?

- Oui
- Non
- Inconnu

**2-3 Si Oui, dernière classe fréquentée**

- CP1
- CP2
- CE1
- CE2
- CM1
- CM2
- 6ème
- 5ème
- 4ème
- 3ème
- 2nde
- 1ère
- Terminale
- Supérieur
- Inconnu

**2-4 Quelle est votre occupation principale actuelle?**

- Fonctionnaire ou Salarié (privé)
- Petit commerce
- Agriculture
- Pêche
- Chasse
- Elevage
- Artisanat
- Elève/Etudiant (e)
- Descolarisé (e)
- Inactif (ve)
- Enfant non encore scolarisé
- Autre

**2-5 Si autre, préciser**

---

**2-6 Religion :**

- Chrétienne
- Musulmane
- Autre

**2-7 Si autre, préciser**

---

**2- 8 Ethnie :**

---

Antécédents personnels

**2-9 La mère est-elle là pour répondre aux questions concernant la grossesse/enfance?**

- Oui
- Non

**2-10 Lieu/structure de naissance de l'enquêté ?**

- Domicile
- Centre de sante
- Hopital
- Autre
- Inconnu

**2-11 Si autre, préciser**

---

**2-12 Accouchement**

- Normal
- Accouchement difficile (ventouse/forceps)
- Césarienne
- Inconnu

**2-13 Traumatisme à la naissance**

- Oui
- Non
- Inconnu

**2-14 Si oui, lequel ?**

---

**2-15 Le participant enquêté est-il né prématuré?**

- Oui
- Non
- Inconnu

**2-16 Si oui, terme de la grossesse (en semaines)**

*Mettre 99 si inconnu*

---

**2-17 Est-ce que l'enfant a crié aussitôt à la naissance ?**

- Oui
- Non
- Inconnu

**2-18 Avez-vous observé un des symptômes suivants avant le début des chutes de la tête ?**

- Baisse de la compréhension
- Périodes de fixité ou de regard vide (évasif)
- Faiblesse corporelle générale
- Somnolence excessive
- Périodes d'inattention
- Léthargie (catalepsie, torpeur)
- Étourdissements (vertiges)

**2-19 Si baisse de la compréhension, depuis quand ?**

*En mois, mettre 99 si inconnu*

---

**2-20 Si périodes de fixité ou de regard vide (évasif), depuis quand ?**

*En mois, mettre 99 si inconnu*

---

**2-21 Si faiblesse corporelle générale, depuis quand ?**

*En mois, mettre 99 si inconnu*

---

**2-22 Si somnolence excessive, depuis quand ?**

*En mois, mettre 99 si inconnu*

---

**2-23 Si périodes d'inattention, depuis quand ?**

*En mois, mettre 99 si inconnu*

---

**2-24 Si léthargie (catalepsie, torpeur), depuis quand ?**

*En mois, mettre 99 si inconnu*

---

**2-25 Si étourdissements (vertiges), depuis quand ?**

*En mois, mettre 99 si inconnu*

---

**2-26 Avez-vous observé un des symptômes suivants depuis le début des chutes de la tête ?**

- Difficultés à parler (s'exprimer)
- Comportement agressif
- Épisodes répétés de regards vides
- Difficulté de concentration (Manque d'attention)
- Difficultés d'apprentissage
- Mémoire déficiente (troubles de la mémoire)
- Insomnies
- Difficulté d'endormissement
- Dort excessivement
- Hyperactif (agité)
- Amorphe (mou)
- Hallucinations visuelles
- Hallucinations auditives
- Déficience visuelle (baisse de la vision)
- Déficience auditive (baisse de l'audition)
- Errance (se perd et est recherché)
- Fugues (s'enfuit volontairement à plusieurs reprises)
- Périodes prolongées de mauvaise humeur ou de tristesse
- Mange mal (difficilement)
- Crises convulsives
- Déformations de la poitrine et du dos
- Déformations du visage
- Déformations des membres
- Invalidité grave
- Alité (grabataire)

**2-27 Si difficultés à parler (s'exprimer), depuis quand ?**

*En mois, mettre 99 si inconnu*

---

**2-28 Si comportement agressif, depuis quand ?**

*En mois, mettre 99 si inconnu*

---

**2-29 Si épisodes répétés de regards vides, depuis quand ?**

*En mois, mettre 99 si inconnu*

---

**2-30 Si difficultés de concentration (manque d'attention), depuis quand ?**

*En mois, mettre 99 si inconnu*

---

**2-31 Si difficultés d'apprentissage, depuis quand ?**

*En mois, mettre 99 si inconnu*

---

**2-32 Si mémoire déficiente (troubles de la mémoire), depuis quand ?**

*En mois, mettre 99 si inconnu*

---

**2-33 Si insomnies, depuis quand ?**

*En mois, mettre 99 si inconnu*

---

**2-34 Si difficultés d'endormissement, depuis quand ?**

*En mois, mettre 99 si inconnu*

---

**2-35 Si dort excessivement, depuis quand ?**

*En mois, mettre 99 si inconnu*

---

**2-36 Si hyperactif (agité), depuis quand ?**

*En mois, mettre 99 si inconnu*

---

**2-37 Si amorphe (mou), depuis quand ?**

*En mois, mettre 99 si inconnu*

---

**2-38 Si hallucinations visuelles, depuis quand ?**

*En mois, mettre 99 si inconnu*

---

**2-39 Si hallucinations auditives, depuis quand ?**

*En mois, mettre 99 si inconnu*

---

**2-40 Si déficience visuelle (baisse de la vision), depuis quand ?**

*En mois, mettre 99 si inconnu*

---

**2-41 Si déficience auditive (baisse de l'audition), depuis quand ?**

*En mois, mettre 99 si inconnu*

---

**2-42 Si errance (se perd et est recherché), depuis quand ?**

*En mois, mettre 99 si inconnu*

---

**2-43 Si fugues (s'enfuit à plusieurs reprises), depuis quand ?**

*En mois, mettre 99 si inconnu*

---

**2-44 Si périodes prolongées de mauvaise humeur ou de tristesse, depuis quand ?**

*En mois, mettre 99 si inconnu*

---

**2-45 Si mange mal (difficilement), depuis quand ?**

*En mois, mettre 99 si inconnu*

---

**2-46 Si crises convulsives, depuis quand ?**

*En mois, mettre 99 si inconnu*

---

**2-47 Si déformations de la poitrine et du dos, depuis quand ?**

*En mois, mettre 99 si inconnu*

---

**2-48 Si déformations du visage, depuis quand ?**

*En mois, mettre 99 si inconnu*

---

**2-49 Si déformations des membres, depuis quand ?**

*En mois, mettre 99 si inconnu*

---



**2-50 Si invalidité grave, depuis quand ?***En mois, mettre 99 si inconnu*  

---

**2-51 Si alité (grabataire), depuis quand ?***En mois, mettre 99 si inconnu*  

---

**2-52 L'enquêté prend t-il ou a-t-il pris des médicaments depuis le début des crises (HT) ?**

- Oui
- Non
- Inconnu

**2-53 Si oui, à quelle fréquence ?**

- De façon régulière (périodicité)
- Après chaque crise
- Continuellement
- Inconnu

**2-54 Quel(s) médicament(s)**

- Anti-convulsivant
- Anti-épileptique
- Médicament traditionnel
- Autre

**2-55 Si autre, préciser**  

---

**2-56 L'enquêté a-t-il pris de l'ivermectine ou Mectizan (par voie orale) ?**

- Oui
- Non
- Inconnu

**2-57 Si oui avant et/ou après le début des crises ?**

- Avant
- Après
- Avant et Après
- Inconnu

**2-58 L'enquêté prend t-il ou a-t-il pris d'autres médicaments sur une période supérieure à 3 mois ?**

- Oui
- Non
- Inconnu

**2-59 Si oui, quel médicament ?**

---

Habitudes alimentaires

**2-60 L'enquêté consomme-t-il régulièrement de la viande ?**

- Oui
- Non
- Inconnu

**2-61 Si oui, quelle viande consomme t'il fréquemment ?**

*Remarque : On peut citer plusieurs viandes, mettre "Inconnu" si ne sait pas*

**2-62 L'enquêté consomme t'il régulièrement le poisson ?**

- Oui
- Non
- Inconnu

**2-63 Si oui, quelle poisson consomme t'il fréquemment ?**

*Remarque : On peut citer plusieurs poissons, mettre "Inconnu" si ne sait pas*

**2-64 Quels autres aliments consomme-t-il régulièrement ?**

- Légumes
- Fruits
- Produits laitiers
- Tubercules
- Fruits de mer
- Oeufs
- Autres

**2-65 Si autres, préciser**

**2-66 Quelle eau consomme-t-il régulièrement ?**

- Réseau publique (eau courante)
- Forage
- Minérale
- Rivière
- Puits
- Autre

**2-67 Si autre, préciser**

---

Antécédents familiaux

**2-68 L'enquêté a combien de frères et sœurs ?**

*Mettre 99 si inconnu*

---

**2-69 Quel est sa position dans la fratrie ?**

*Mettre 99 si inconnu*

---

**2-70 L'enquêté a-t-il un jumeau ou une jumelle ?**

- Oui
- Non
- Inconnu

**2-71 Si oui, a-t-il (elle) aussi des chutes de la tête ?**

- Oui
- Non
- Inconnu

**2-72 Est-ce qu'il y a d'autres personnes avec chute de la tête dans la famille ?**

*En dehors du jumeau le cas échéant*

- Oui
- Non
- Inconnu

**2-73 Si oui, est-elle décédée ou vivante ?**

- Décédée
- Vivante
- Inconnu

**2-74 Y a-t-il des cas d'épilepsie dans la famille ?**

- Oui
- Non
- Inconnue

**2-75 Y a-t-il eu des pénuries alimentaires dans la famille ?**

- Oui
- Non
- Inconnu

Histoire de la migration

**2-76 Depuis quand le participant vit-il dans le village?**

- < 1 an
- > 1 an
- Inconnu

**2-77 Le participant a-t-il vécu dans un autre village ?**

- Oui
- Non
- Inconnu

**2-78 Si oui, lequel?**

---

**2-79 En quelle année s'est-il déplacé ?**

*Mettre 999 si inconnu*

---

**2-80 Pour quelle raison s'est-elle déplacée?**

- Guerre
- Raison professionnelle (même d'un autre membre de la famille)
- Autre
- Inconnu

**2-81 Si autre, préciser**

**2-82 Avez-vous vécu dans des camps de réfugiés (avec la famille) ?**

- Oui
- Non
- Inconnu

**2-83 Avez vous connu et vécu la guerre ?**

- Oui
- Non
- Inconnu

**2-84 L'enquête a-t-il subit des traumatismes de guerre avec séquelles psychologiques ?**

- Oui
- Non
- Inconnu

**2-85 Acceptez vous qu'une photo soit prise ?**

Click here to upload file. (< 5MB)

**2-86 Acceptez vous qu'une 2ème photo soit prise ?**

Click here to upload file. (< 5MB)

**2-87 Commentaires libres de l'enquêteur**

---
