# Supplementary material for: First description of Nodding Syndrome in the Central African Republic
Source: PLoS Negl Trop Dis. 2021 Jun 18;15(6):e0009430. doi: 10.1371/journal.pntd.0009430 (PMC8244846; doi:10.1371/journal.pntd.0009430)
Supplement: S2 File — (PDF) [file pntd.0009430.s002.pdf]

## Questionnaire confirmation épilepsie

NOM de l'enquêteur: \_\_\_\_\_

DATE : \_\_\_\_/\_\_\_\_/\_\_\_\_

☐ Neurologue

Identifiant : \_\_\_\_/\_\_\_\_/\_\_\_\_

### 1. Renseignements généraux

- 1.1. Le répondant est-il le participant lui-même ? ☐ OUI ☐ NON  
Si NON, quelle est la relation entre le participant et le répondant ? \_\_\_\_\_
- 1.2. Un traducteur a-t-il été nécessaire ? ☐ OUI ☐ NON
- 1.3. Depuis quand le participant vit-il dans le village? ☐ < 1 an ☐ > 1an ☐ Ne sait pas  
Si plus de 1 an, nombre d'années : \_\_\_\_\_ années  
Si la personne vivait avant dans un autre village, lequel? \_\_\_\_\_

### 2. Caractéristiques socio-démographiques

- 2.1. Age : \_\_\_\_\_
- 2.2. Sexe : ☐ M ☐ F
- 2.3. Poids (kg): \_\_\_\_\_, \_\_\_\_ kg
- 2.4. Taille (cm) : \_\_\_\_\_ cm
- 2.5. Niveau scolaire : ☐ Aucun ☐ Primaire ☐ Secondaire ☐ Supérieur
- 2.6. Activité principale du participant: ☐ aucune si enfant ☐ agriculture ☐ pêche ☐ chasse
- 2.7. ☐ élevage ☐ commerce ☐ artisan ☐ autre, spécifier : \_\_\_\_\_

### 3. Notion de la prise de Mectizan

- 3.1. Est-ce que le participant a déjà pris Mectizan (par voie orale) ☐ Oui ☐ Non ☐ NSP  
Si oui, combien de fois? \_\_\_\_\_ nombre de fois
- 3.2. Est-ce que le participant a déjà pris Mectizan (par voie orale) avant le début de l'épilepsie ?  
☐ OUI ☐ NON ☐ Ne sait pas
- 3.3. Au cours de ces deux dernières années, le participant a-t-il pris du Mectizan ? ☐ OUI ☐ NON
- 3.4. Quand le participant a-t-il pris la dernière fois Mectizan? Année 20\_\_\_\_ Mois \_\_\_\_\_

### 4. Antécédents concernant la naissance/enfance du participant enquêté

- 4.1. La mère présente pour répondre aux questions ? ☐ Oui ☐ Non
- 4.2. Lieu de naissance du participant enquêté ?  
☐ Domicile ☐ Centre de Santé ☐ Hôpital ☐ Autre ☐ NSP
- 4.3. Accouchement : ☐ normal ☐ accouchement difficile/ventouse/forceps ☐ par césarienne
- 4.4. Le participant enquêté est-il né prématuré ? ☐ Oui ☐ Non ☐ NSP
- 4.5. Est-ce que l'enfant a crié à la naissance ☐ Oui ☐ Non ☐ NSP
- 4.6. Age de début des symptômes de l'épilepsie : \_\_\_\_\_
- 4.7. Est-ce qu'avant l'épilepsie, le participant a souffert de :  
☐ traumatisme crânien? ☐ encéphalite/méningite? ☐ neuro-paludisme?  
☐ rougeole ☐ maladie du sommeil ? ☐ autre maladie grave ☐ NSP
- 4.8. si autre maladie, spécifier \_\_\_\_\_

- 4.9. Convulsions fébriles dans l'enfance (0-10ans). ☐ OUI ☐ NON ☐ NSP  
Si oui, à quel âge les convulsions fébriles ont débuté ? \_\_\_\_\_

### 5. Caractéristiques des crises épileptiques

- 5.1. Perte de connaissance et/ou convulsions?

☐ Jamais ☐ Une fois ☐ Deux fois ou plus ☐ NSP

5.2. Perte(s) de connaissance avec perte(s) d'urine ?

☐ OUI ☐ NON ☐ NSP

5.3. Perte(s) de connaissance avec émission de bave et/ou morsure de langue?

☐ OUI ☐ NON ☐ NSP

5.4. Absence(s) ou perte(s) de contact brève avec l'entourage (participant ne répond pas, de début brutal et de durée brève)?

☐ OUI ☐ NON ☐ Ne sait pas

5.5. Épisodes de hochement de tête (HT) ?

☐ OUI ☐ NON ☐ NE SAIT PAS

5.6. A quel âge les hochements de tête ont-ils commencé ? \_\_\_\_\_

5.7. Est-ce que la personne présente toujours de hochements de tête ?

☐ Oui ☐ Non ☐ NSP

Si non, depuis quel âge les hochements de tête ont-ils disparu? \_\_\_\_\_

Préciser la cause de la disparition du HT : ☐ spontanément ☐ traitement antiépileptique ☐ NSP

Spécifier le traitement : \_\_\_\_\_

5.8. Secousses ou mouvements anormaux incontrôlables d'un ou des membres (convulsions, de début soudain et

5.9. d'une durée de quelques minutes) ?

☐ Oui ☐ Non ☐ NSP

5.10. Apparition brutale et de durée brève de sensations corporelles étranges, d'hallucinations ou d'illusions

5.11. visuelles, auditives ou olfactives?

☐ Oui ☐ Non ☐ NSP

5.12. Estimation de la durée de la crise : \_\_\_\_\_ minutes

## 6. Antécédents de crises d'épilepsie

6.1. A-t-on déjà dit à la personne qu'elle était épileptique ou qu'il avait déjà fait des crises d'épilepsie ?

☐ Oui ☐ Non ☐ NSP

6.2. Le participant a-t-il présenté une crise dans les 5 dernières années ?

☐ Oui ☐ Non ☐ NSP

6.3. Le participant a-t-il présenté une crise la dernière année

☐ Oui ☐ Non ☐ NSP

6.4. Le participant a-t-il présenté une crise le dernier mois

☐ Oui ☐ Non ☐ NSP

6.5. Combien de crises d'épilepsie le participant a-t-il présenté par an? \_\_\_\_\_ fois/an.

Si le participant à présente :

plus de 12 crises d'épilepsie par an, alors, préciser le nombre de crise par mois : \_\_\_\_\_ fois/mois

plus de 30 crises d'épilepsie par mois, alors, préciser le nombre de crise par jour : \_\_\_\_\_ fois/jour

## 7. Type d'épilepsie

7.1. Crises généralisées : ☐ OUI ☐ NON

Si oui, ☐ tonico-cloniques ☐ atoniques ☐ autre, spécifier \_\_\_\_\_

7.2. Absences ☐ OUI ☐ NON

7.3. Crises avec début focale sans de perte de connaissance: ☐ Oui ☐ Non

Si oui, ☐ motrices ☐ sensorielles

7.4. Crises avec début focal avec perte de connaissance : ☐ Oui ☐ Non

Si oui : ☐ motrices ☐ sensorielles

7.5. Crise avec début focal secondairement bilatéralement tonico-clonique : ☐ Oui ☐ Non

7.6. Hochement de tête (avec/sans altération de l'état de conscience) ☐ Oui ☐ Non ☐ NSP

Si oui, est-ce que durant le hochement la personne :

☐ ne répond pas aux questions ☐ arrête de manger ☐ tombe/convulse ☐ reste lucide

7.7. Quel facteur peut déclencher la crise (hochement de tête ou autre forme d'épilepsie)?

(plusieurs réponses possibles) : ☐ pas de facteur spécifique ☐ surtout au réveille ☐ la nuit ☐ le froid

☐ le repas ☐ les orages ☐ Ne sait pas ☐ autre, à

spécifier: \_\_\_\_\_

**8. Développement psycho-moteur du participant (comparativement aux enfants du même âge)****8.1. AVANT le début de l'épilepsie ?**

- 8.1.1. Capacité de marcher ? ☐ tôt ☐ même âge ☐ plus tard ☐ nsp  
8.1.2. Capacité de parler avec des phrases ? ☐ tôt ☐ même âge ☐ plus tard ☐ nsp  
8.1.3. Est-ce que l'enfant a grandi ☐ plus vite ☐ normalement ☐ moins vite ☐ nsp

**8.2. APRES début de l'épilepsie ?**

- 8.2.1. Capacité de marcher ? ☐ tôt ☐ même âge ☐ plus tard ☐ nsp  
8.2.2. Capacité de parler avec des phrases ? ☐ tôt ☐ même âge ☐ plus tard ☐ nsp  
8.2.3. Est-ce que l'enfant a grandi ☐ plus vite ☐ normalement ☐ moins vite ☐ nsp

**8.3. Est-ce que durant l'année précédant la première crise d'épilepsie la personne présentait déjà une régression des acquisitions psycho-motrices ?** ☐ Oui ☐ Non ☐ nsp

Si oui, spécifier : \_\_\_\_\_

**9. Traitements****9.1. Prenez-vous des médicaments MODERNES contre l'épilepsie ?**

- ☐ Jamais ☐ De façon irrégulière ☐ Après chaque crise ☐ Continuellement.

Si prise d'antiépileptiques modernes, préciser lesquels? \_\_\_\_\_

**9.2. Prenez-vous des médicaments TRADITIONNELS contre l'épilepsie ?**

- ☐ Jamais ☐ De façon irrégulière ☐ Après chaque crise ☐ Continuellement.

**10. Antécédent familiaux****10.1. Est-ce qu'il y a d'autres personnes avec épilepsie dans la famille** ☐ Oui ☐ Non ☐ nsp

Si oui, préciser : ☐ père ☐ mère ☐ frère ou sœur : préciser le nombre : \_\_\_\_\_

**10.2. Le participant enquêté a-t-il un jumeau ou une jumelle identique ?** ☐ Oui ☐ Non ☐ nsp**10.3. Si oui, est-ce que le jumeau souffre d'épilepsie ?** ☐ OUI ☐ NON ☐ nsp**11. Examen clinique**

11.1. État général ☐ Bon ☐ modérément altéré ☐ mauvais

11.2. Vision normale ☐ OUI ☐ NON

11.3. Œil vitreux ☐ OUI ☐ NON

11.4. Aveugle ? ☐ Un œil ☐ 2 yeux ☐ NON

11.5. Nombre de cicatrices de brûlures \_\_\_\_\_

11.6. Rétractions dues aux brûlures ☐ OUI ☐ NON

11.7. Lésions traumatiques dus aux crises ☐ OUI ☐ NON

11.8. Nombre de lésions traumatiques du a aux crises \_\_\_\_\_

11.9. Papules prurigineuses ☐ OUI ☐ NON

11.10. Peau de léopard ☐ OUI ☐ NON

11.11. Peau de lézard ☐ OUI ☐ NON

11.12. Démangeaisons / prurit ☐ OUI ☐ NON

11.13. Peau normale ☐ OUI ☐ NON

11.14. Nodules sous cutanés palpables ☐ OUI ☐ NON

11.15. Lymphoedeme ☐ oui ☐ non

11.16. Candidose buccale ☐ oui ☐ non

11.17. Signes de morsures de langue ☐ oui ☐ non

11.18. Ganglions cervicaux anormaux (>1cm) ☐ oui ☐ non

11.19. Adolescent/adulte qui ressemble a un enfant ☐ oui ☐ non

11.20. Déformation corporelle: ☐ thoracique ☐ colonne vertébrale ☐ visage ☐ si déformations, spécifier : \_\_\_\_\_

**12. Examen neurologique**

12.1. Conscience ☐ normale ☐ altérée

12.2. Trouble mental ? ☐ Oui ☐ Non

Si oui, préciser l'importance :

☐ Peu important (ne dérange pas les activités)

☐ Modérément important (dérange les activités mais encore actif)

☐ Important (empêche d'exercer les activités habituelles)

12.3. Est-ce que avant le développement de l'épilepsie la personne présentait déjà, ces troubles mentaux ☐ Oui  
☐ Non

12.4. Si oui, préciser \_\_\_\_\_

12.5. La marche est-elle normale ?

☐ Oui

☐ base élargie

☐ spastique

☐ hémiplégique

12.6. Faiblesse musculaire ? ☐ Non ☐ généralisée ☐ localisée

12.7. Paralyse ? ☐ Non ☐ Oui, spécifier \_\_\_\_\_

12.8. Contractures ? ☐ Non ☐ Oui

12.9. Conclusion examen neurologique : ☐ Normal ☐ Anormal, spécifier \_\_\_\_\_

### 13. Diagnostic

☐ Epilepsie, sans hochement de tête ☐ Syndrome du hochement de tête

☐ Hochement de tête et autre forme d'épilepsie ☐ Non-épileptique

☐ Autre diagnostic à spécifier : \_\_\_\_\_

### PRELEVEMENTS / TESTS

14. Test biologique

Résultat du test OV16 : ☐ Négatif ☐ Positif ☐ pas fait

Signature MD/personnel santé

Date : |\_|\_| / |\_|\_| / |\_|\_|\_|\_|
